# Supplementary material for: Effects of Mediterranean Diet or Low-Fat Diet on Blood Fatty Acids in Patients with Coronary Heart Disease. A Randomized Intervention Study
Source: MDPI journal article supplement (doi:10.3390/nu13072389), 2021-07-13
Supplement: s1 [file s1]

**Table S1:** Correlations between the blood fatty acids profile and each item of PREDIMED questionnaire after three months of nutritional intervention (n=120).

| <b>PREDIMED Items</b><br><b>Fatty acids</b> | <b>Olive oil per day</b> | <b>Vegetable servings per day</b> | <b>Fruit units per day</b> | <b>sweet or carbonated beverages per day</b> | <b>Wine per week</b> | <b>Servings of fish or shellfish per week</b> | <b>Servings of nuts per week</b> |
|---------------------------------------------|--------------------------|-----------------------------------|----------------------------|----------------------------------------------|----------------------|-----------------------------------------------|----------------------------------|
| <b>Total Saturated Fatty Acids</b>          |                          |                                   |                            |                                              | 0.23<br>(0.01)       |                                               | -0.23<br>(0.01)                  |
| <b>16:0 (Palmitic Acid)</b>                 |                          |                                   |                            |                                              | 0.33<br>(0.0002)     |                                               | -0.34<br>(0.0002)                |
| <b>Total Monounsaturated Fatty Acids</b>    |                          |                                   |                            |                                              |                      |                                               | -0.29<br>(0.001)                 |
| <b>16:1 (Palmitoleic Acid)</b>              |                          |                                   |                            | 0.23<br>(0.01)                               |                      |                                               | -0.26<br>(0.004)                 |
| <b>18:1 (Oleic Acid)</b>                    |                          |                                   |                            |                                              |                      |                                               | -0.27<br>(0.003)                 |
| <b>24:1</b>                                 | 0.26<br>(0.004)          | 0.25<br>(0.007)                   |                            |                                              |                      |                                               |                                  |
| <b>20:3 n-9 (Mead Acid)</b>                 |                          |                                   | -0.23<br>(0.01)            |                                              |                      | -0.27<br>(0.003)                              |                                  |
| <b>Total Polyunsaturated Fatty Acids</b>    |                          |                                   |                            |                                              |                      |                                               | 0.37<br>( $<0.0001$ )            |
| <b>Total n-6</b>                            |                          |                                   |                            |                                              | -0.24<br>(0.01)      |                                               | 0.33<br>(0.0003)                 |
| <b>18:2 n-6 (LA)</b>                        |                          |                                   |                            |                                              |                      |                                               | 0.31<br>(0.001)                  |
| <b>22:4n-6</b>                              |                          | -0.27<br>(0.004)                  |                            |                                              |                      | -0.42<br>( $<0.0001$ )                        |                                  |
| <b>22:5 n-6 (DPA n-6)</b>                   |                          |                                   |                            |                                              |                      | -0.32<br>(0.0005)                             |                                  |
| <b>Total n-3</b>                            |                          |                                   |                            |                                              |                      | 0.26<br>(0.004)                               | 0.24<br>(0.007)                  |
| <b>18:3 n-3 (ALA)</b>                       |                          |                                   |                            |                                              |                      |                                               | 0.32<br>(0.0004)                 |
| <b>20: 5 n-3 (EPA)</b>                      |                          |                                   |                            |                                              |                      | 0.38<br>( $<0.0001$ )                         | 0.31<br>(0.001)                  |
| <b>22:6 n-3 (DHA)</b>                       |                          |                                   |                            |                                              |                      | 0.25<br>(0.006)                               |                                  |
| <b>EPA+DHA</b>                              |                          |                                   |                            |                                              |                      | 0.29<br>(0.001)                               |                                  |
| <b>Total n-6/Total n-3</b>                  |                          |                                   |                            |                                              |                      | -0.33<br>(0.0002)                             |                                  |

Spearman's correlation r and (p-value). Only food items and fatty acid species with significant correlations  $p < 0.01$  were included in the table.

LA: Linoleic Acid; GLA:  $\gamma$ -Linolenic Acid; DHGLA: diomo- $\gamma$ -Linolenic Acid; AA: Arachidonic Acid; DPA: Docosapentaenoic Acid; ALA:  $\alpha$ -Linolenic Acid; EPA: Eicosapentaenoic Acid; DHA: Docosahexaenoic Acid.
